# Supplementary material
Source: PubMed Central journal article supplement (PMC6504569)
Supplement: NIHMS1511879-supplement-1.pdf [file NIHMS1511879-supplement-1.pdf]

**eFigure Legends**

**Supplemental Figure 1:** Pediatric Asthma Risk Score (PARS) Scoring Sheet.

## Pediatric Asthma Risk Score (PARS) Scoring Sheet

|                                                        | Possible Scores |     | Child's Score |
|--------------------------------------------------------|-----------------|-----|---------------|
|                                                        | No              | Yes |               |
| 1. Parental Asthma                                     | 0               | 2   |               |
| 2. Eczema before age 3 years                           | 0               | 2   |               |
| 3. Wheezing apart from colds                           | 0               | 3   |               |
| 4. Wheezing before age 3 years                         | 0               | 3   |               |
| 5. African-American Race                               | 0               | 2   |               |
| 6. SPT positive to $\geq 2$ aero and/or food allergens | 0               | 2   |               |
| <b>Child's PARS (add lines 1-6 above):</b>             |                 |     |               |

### Patient Score Interpretation

| Score | Risk of Asthma by age 7 years | Interpretation       |                                                                                                                              |
|-------|-------------------------------|----------------------|------------------------------------------------------------------------------------------------------------------------------|
| 0     | 3%                            | <b>LOW RISK</b>      | Children with these scores have a 1 in 33 [score of 0] to a 1 in 9 [score of 4] risk of developing asthma by age 7 years     |
| 2     | 6%                            |                      |                                                                                                                              |
| 3     | 8%                            |                      |                                                                                                                              |
| 4     | 11%                           |                      |                                                                                                                              |
| 5     | 15%                           | <b>MODERATE RISK</b> | Children with these scores have a 1 in 7 risk [Score of 5] to a 1 in 3 [Score of 8] risk of developing asthma by age 7 years |
| 6     | 19%                           |                      |                                                                                                                              |
| 7     | 25%                           |                      |                                                                                                                              |
| 8     | 32%                           |                      |                                                                                                                              |
| 9     | 40%                           | <b>HIGH RISK</b>     | Children with these scores have a 2 in 5 [Score of 9] to a 4 in 5 [Score of 14] risk of developing asthma by age 7 years     |
| 10    | 49%                           |                      |                                                                                                                              |
| 11    | 58%                           |                      |                                                                                                                              |
| 12    | 66%                           |                      |                                                                                                                              |
| 14    | 79%                           |                      |                                                                                                                              |

**Supplemental Table I. Observed and Predicted Risk of Asthma by PARS and Agreement between PARS and API**

| <b>PARS</b>                                                | <b>0</b> | <b>2</b> | <b>3</b> | <b>4</b> | <b>5</b> | <b>6</b> | <b>7</b> | <b>8</b> | <b>9</b> | <b>10</b> | <b>11</b> | <b>12</b> | <b>14</b> |
|------------------------------------------------------------|----------|----------|----------|----------|----------|----------|----------|----------|----------|-----------|-----------|-----------|-----------|
| <b><u>CCAAPS</u></b>                                       |          |          |          |          |          |          |          |          |          |           |           |           |           |
| Observed % Asthma<br>in CCAAPS                             | 2%       | 5%       | 11%      | 13%      | 11%      | 25%      | 28%      | 26%      | 36%      | 48%       | 100%      | 64%       | 68%       |
| PARS Predicted %<br>Asthma in CCAAPS                       | 3%       | 6%       | 8%       | 11%      | 15%      | 19%      | 25%      | 32%      | 40%      | 49%       | 58%       | 66%       | 79%       |
| API predicted %<br>Asthma in CCAAPS<br>observed asthmatics | 0%       | 0%       | 0%       | 0%       | 33%      | 21%      | 80%      | 89%      | 100%     | 100%      | 100%      | 100%      | 100%      |
| <b><u>IOW</u></b>                                          |          |          |          |          |          |          |          |          |          |           |           |           |           |
| Observed % Asthma<br>in IOW                                | 4%       | 10%      | 7%       | 20%      | 7%       | 22%      | 50%      | 43%      | 0%       | 50%       | NA        | 73%       | NA        |
| PARS Predicted %<br>Asthma in IOW                          | 4%       | 8%       | 11%      | 14%      | 19%      | 24%      | 31%      | 38%      | 47%      | 55%       | NA        | 70%       | NA        |

API predicted %

Asthma in IOW

|                     |    |    |    |    |      |     |      |     |    |      |    |      |    |
|---------------------|----|----|----|----|------|-----|------|-----|----|------|----|------|----|
| observed asthmatics | 0% | 0% | 0% | 0% | 100% | 37% | 100% | 85% | NA | 100% | NA | 100% | NA |
|---------------------|----|----|----|----|------|-----|------|-----|----|------|----|------|----|
